# Supplementary material for: Effect of counterion tether length on stability, work function and application of a self-compensated, hole-doped triarylamine- alt -fluorene model polymer
Source: Royal Society of Chemistry journal article supplement (doi:10.1039/d4tc02228a), 2024-01-01
Supplement: d4tc02228a1.pdf [file d4tc02228a1.pdf]

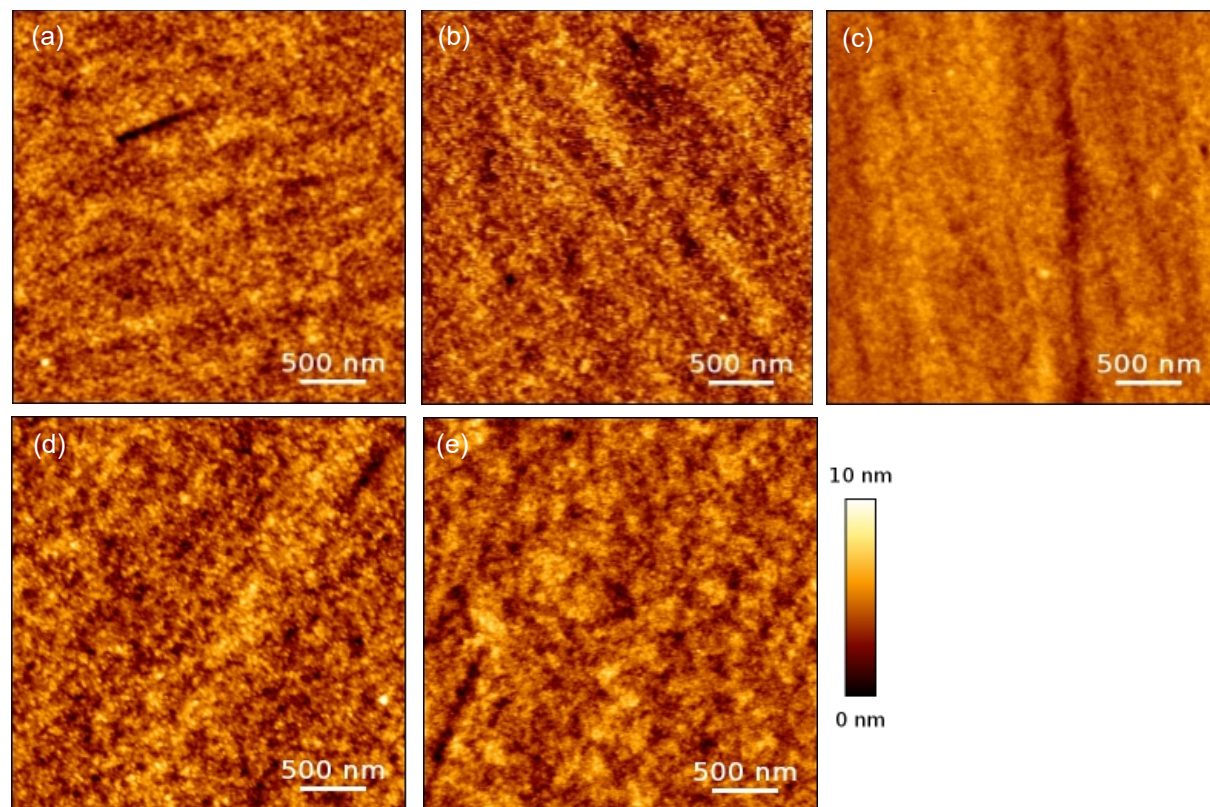

**Supplementary Figure S1. 3x3- $\mu\text{m}$  tapping-mode AFM images of hole-doped mTFF-C $n$ SISC $_2$ F $_5$  films spin-cast on quartz substrate.** Solution-doped films: **(a)**  $n = 2$  ( $R_{\text{rms}} = 9.6 \text{ \AA}$ ), **(b)** 3 ( $11.2 \text{ \AA}$ ), **(c)** 4 ( $6.3 \text{ \AA}$ ); and solid-state-doped films: **(d)** 2 ( $11.1 \text{ \AA}$ ), **(e)**  $n = 6$  ( $10.6 \text{ \AA}$ ). Tool: JPK Nanowizard®ULTRA Speed AFM.  $R_{\text{rms}}$  is root-mean-square roughness.
